# Supplementary material for: Doxorubicin and Varlitinib Delivery by Functionalized Gold Nanoparticles Against Human Pancreatic Adenocarcinoma
Source: MDPI journal article supplement (doi:10.3390/pharmaceutics11110551), 2019-10-24
Supplement: s1 [file s1]

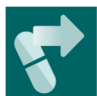

# Supplementary Materials: Doxorubicin and Varlitinib Delivery by Functionalized Gold Nanoparticles Against Human Pancreatic Adenocarcinoma

Sílvia Castro Coelho, Daniel Pires Reis, Maria Carmo Pereira and Manuel A.N. Coelho

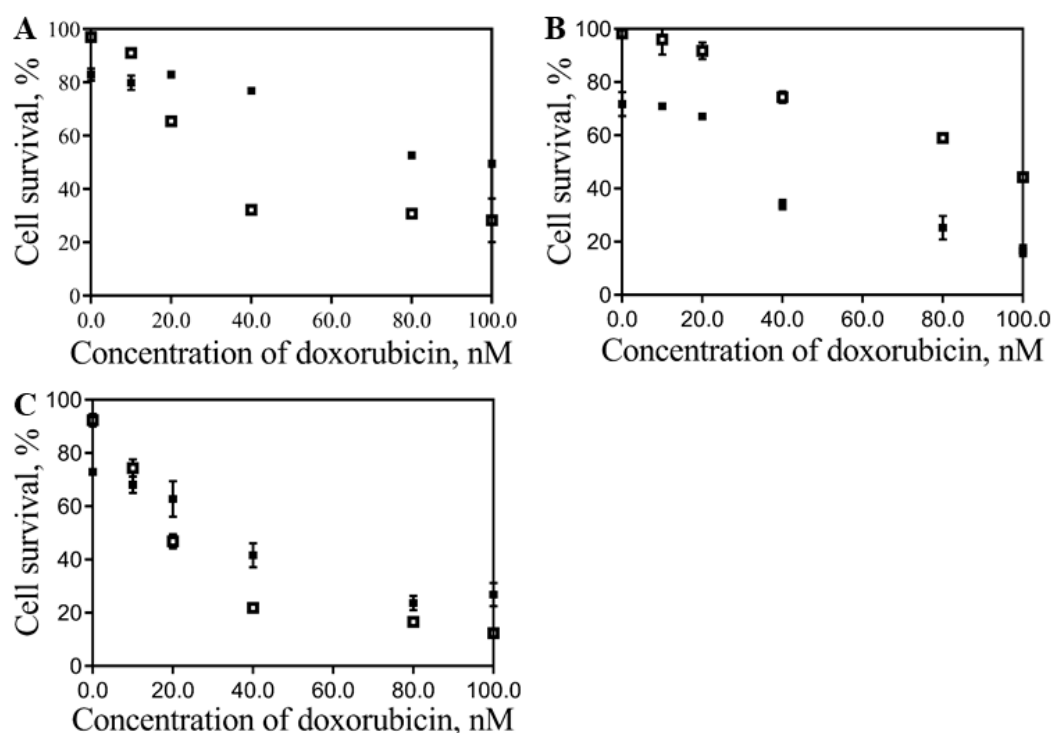

**Figure S1.** Cytotoxic effect of the: (■) DoxPEG AuNPs plus 250 nM VarlPEG AuNPs; (□) free Dox plus 250 nM of free varlinitib on the cell survival ( $IC_{50}$  determination) of MIA PaCa-2 (A), S2-013 (B) and hTERT-HPNE (C) cells. Doxorubicin concentrations range is between 10 and 100 nM.
